# Supplementary material for: DNA double-strand breaks in and beyond heavy-ion tracks: the role of Base Excision Repair and DNA-damage complexity
Source: Research Square preprint supplement (doi:10.21203/rs.3.rs-6975573/v1), 2025-07-22
Supplement: Supplementary file 1 [file 86215a48caf36788bdc695a2.docx]

**Supplementary Information**

**DNA double-strand breaks in and beyond heavy-ion tracks: the role of Base Excision Repair and DNA-damage complexity**

Laura Schwan1,2, Nicole B. Averbeck1,*, Marco Durante1,3, Burkhard Jakob1,2

1Department of Biophysics, GSI Helmholtzzentrum für Schwerionenforschung GmbH, Darmstadt, Germany

2Department of Biology, Technische Universität Darmstadt, Darmstadt, Germany

3Department of Condensed Matter Physics, Technische Universität Darmstadt, Darmstadt, Germany

*Correspondence or requests should be addressed to N.B.A.: n.averbeck@gsi.de

**Supplementary Figure S1**


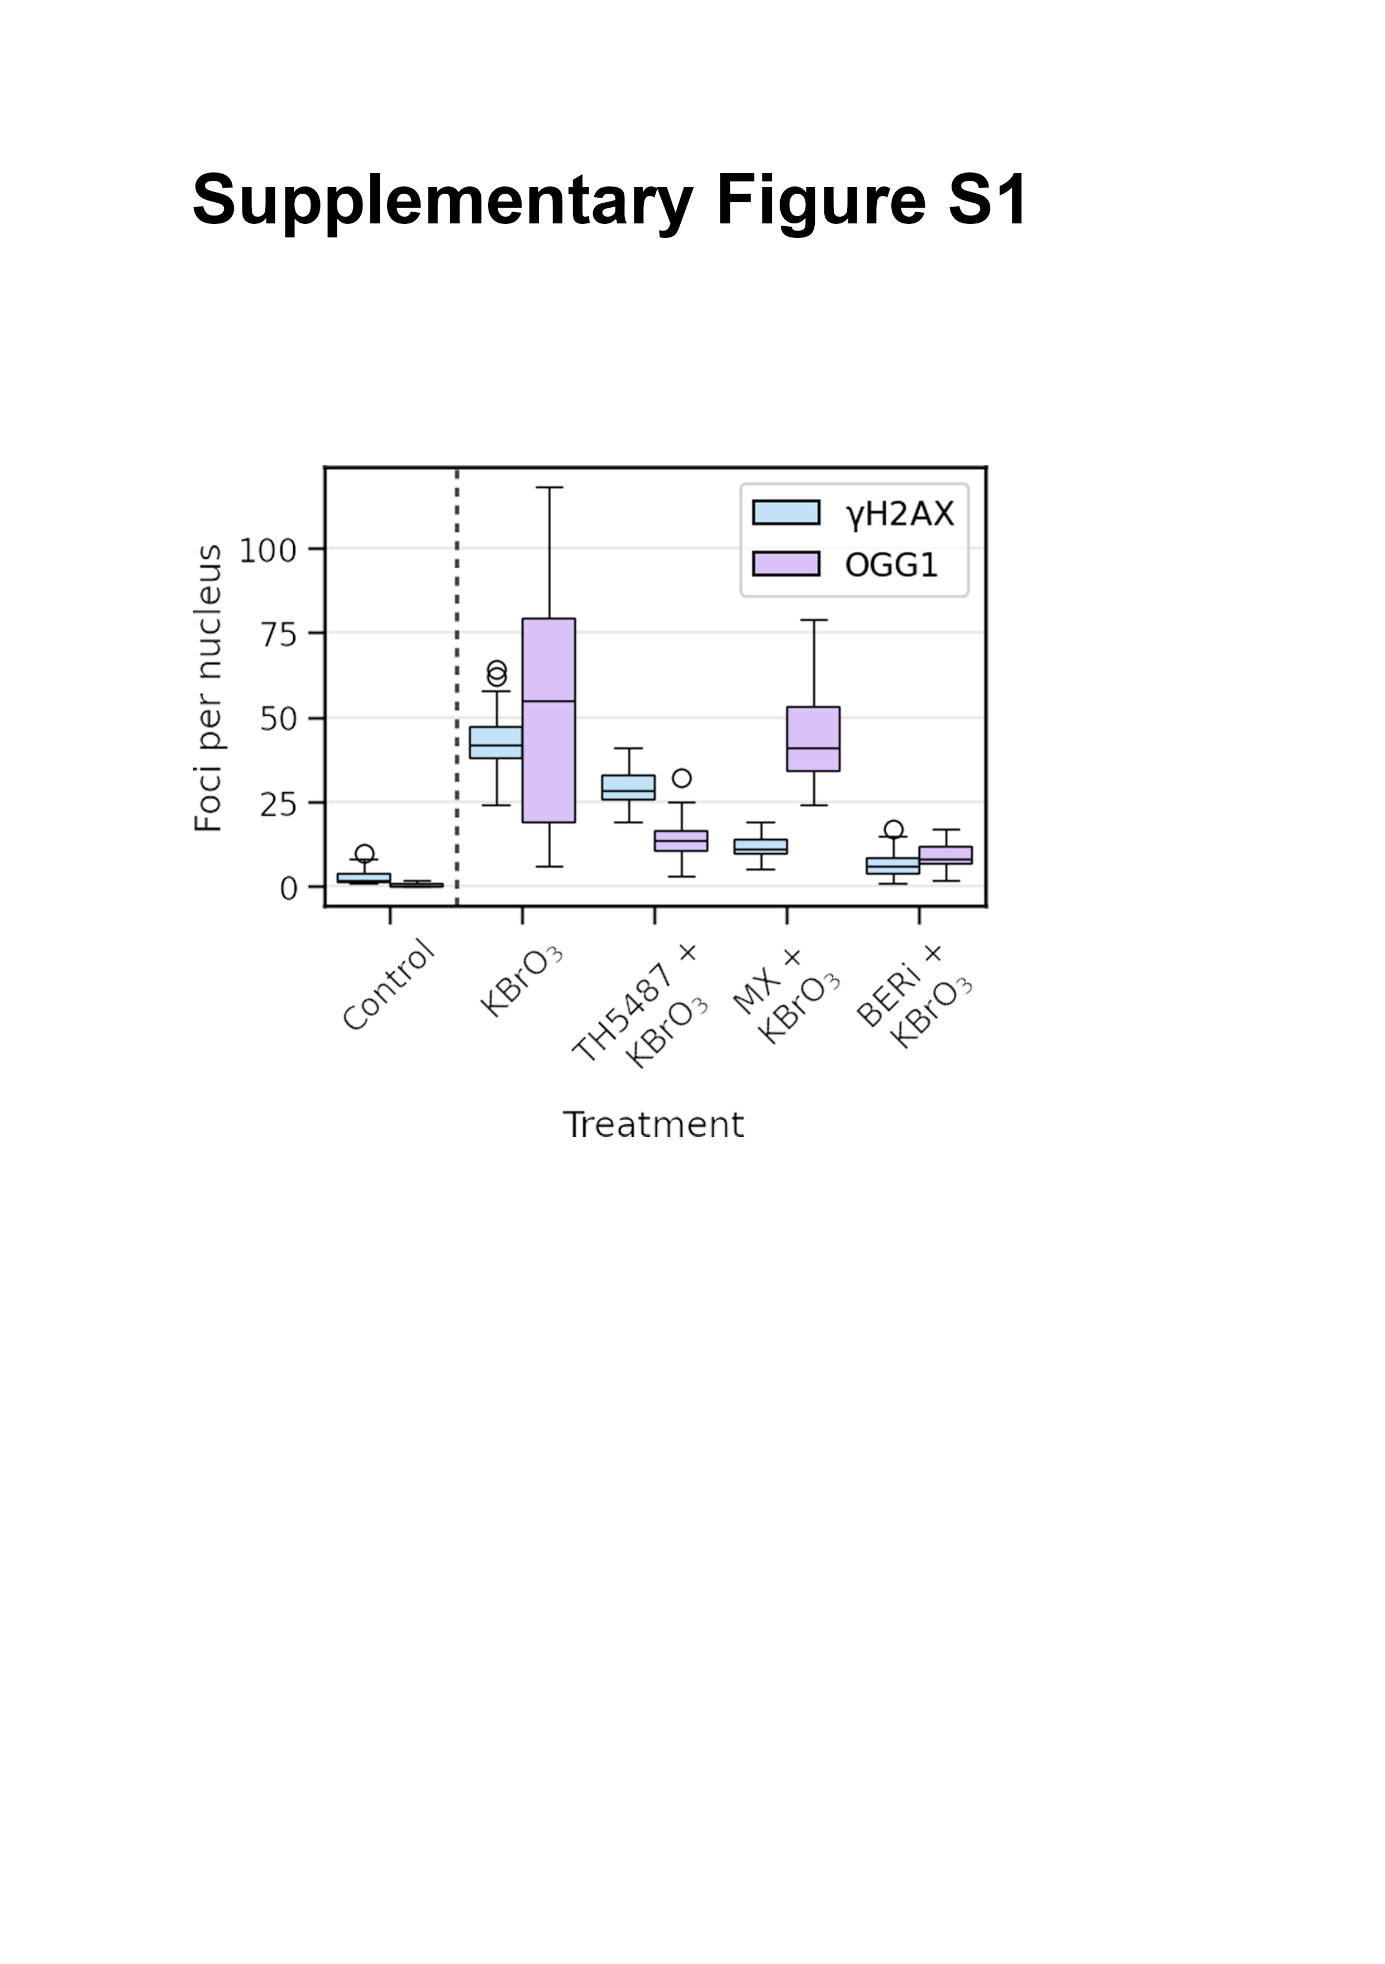


Figure S1: Number of γH2AX and OGG1 foci in normal human fibroblasts without inhibitor (KBrO3), with OGG1 inhibitor TH5487 (TH5487 + KBrO3), with APE1 inhibitor methoxyamine (MX + KBrO3), or with the combination of both (BERi + KBrO3) 1 h after KBrO3 incubation. Control samples without inhibitor and without KBrO3 treatment are on the left to the dashed line. The box ranges from the first to third quartile while the whiskers extend to the 1.5x inter quartile range (ICR), with outliers outside of this range represented as circles and the line within the box as median. With n=25-30 cells per treatment per experiment, N=1-2 independent experiments.

**Supplementary Figure S2**


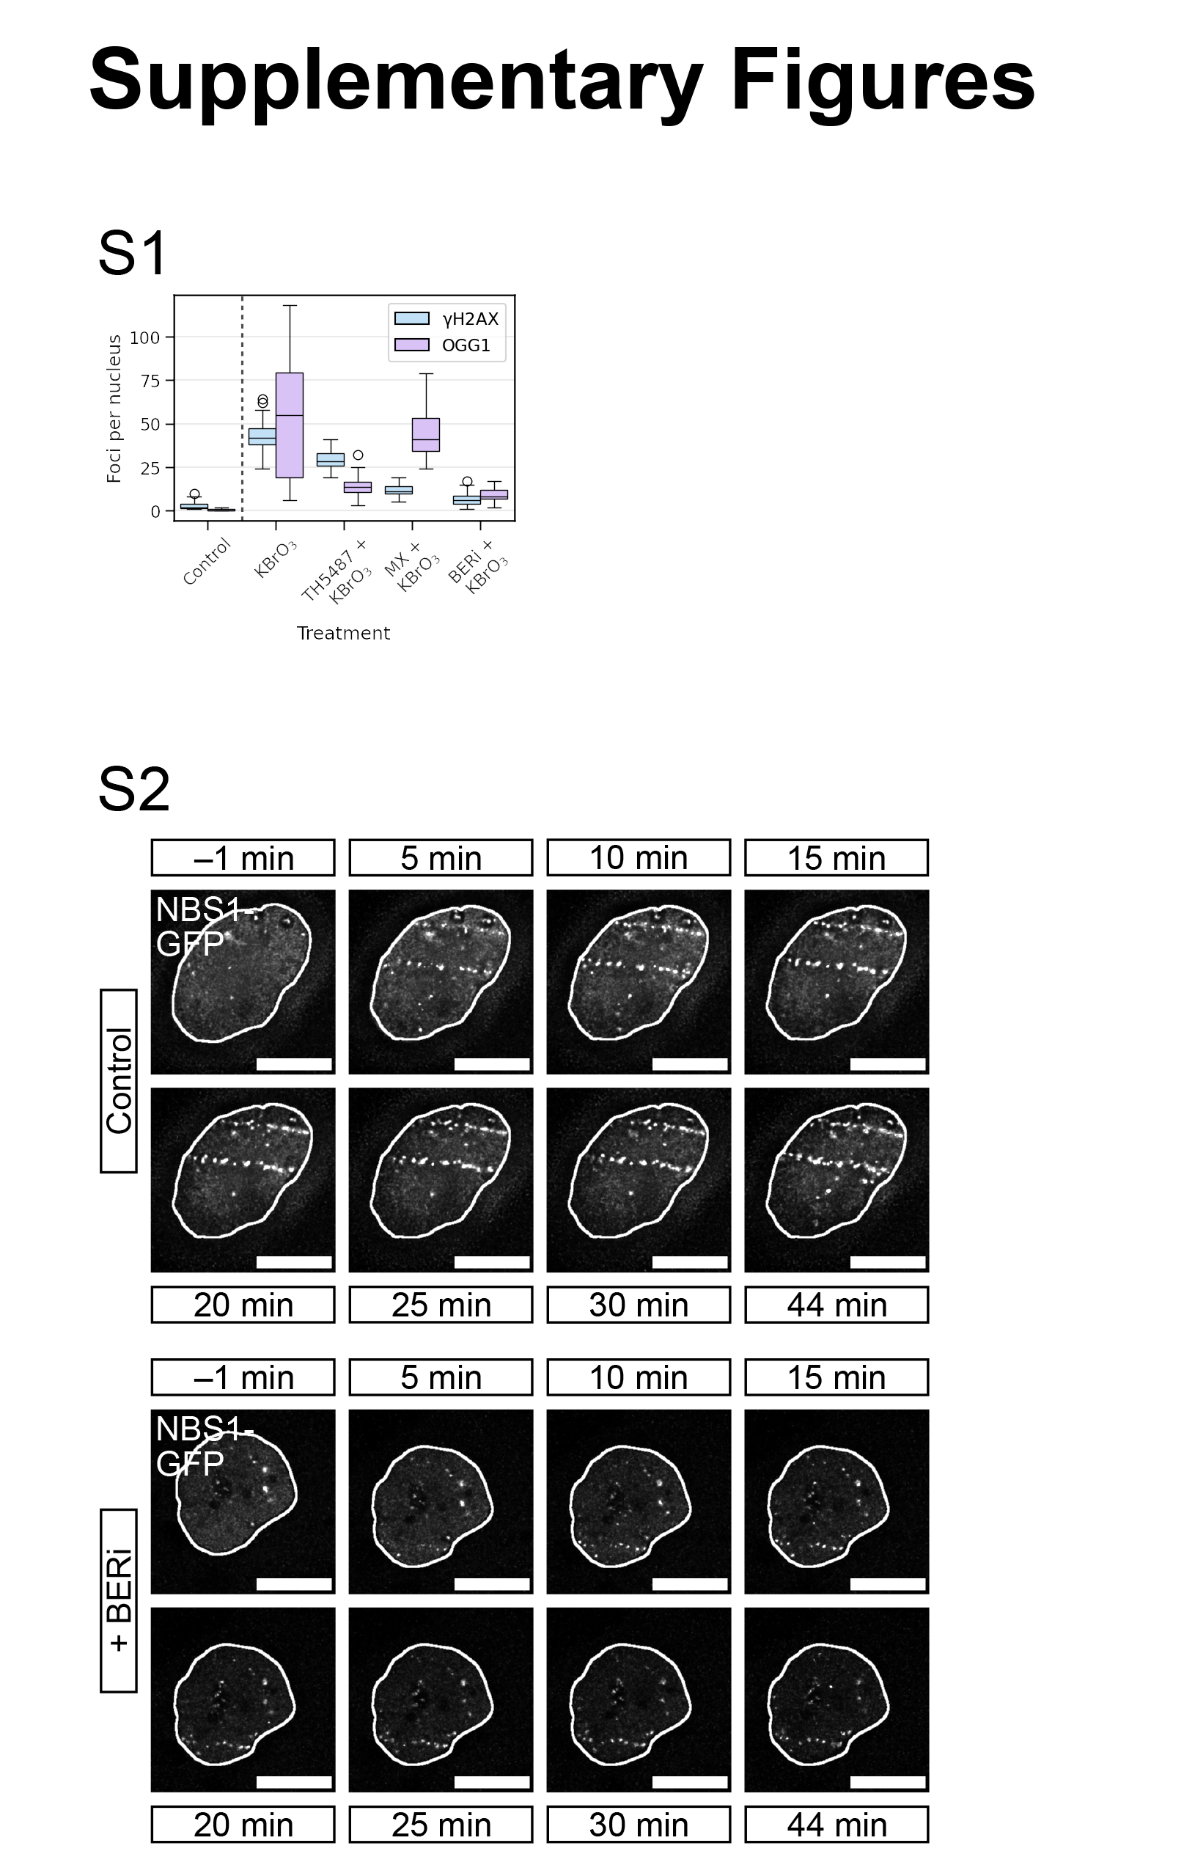


Figure S2: Human osteosarcoma cells expressing GFP-tagged NBS1 were treated with (+ BERi) or without (control) BER inhibitors and irradiated with Fe-ions (350 MeV/n, 3x106 p./cm2). The cells were observed from 1 min before until 44 min after irradiation. Shown are images before (-1 min) and at different times after irradiation. The entire movie is deposited in Supplementary Movie S1. The scale bars indicate 10 µm.
